# Supplementary material for: ABC transporters coordinately expressed during lignification of Arabidopsis stems include a set of ABCBs associated with auxin transport
Source: PubMed Central journal article supplement — J Exp Bot. 2011 Jan 14;62(6):2063–77. doi: 10.1093/jxb/erq416 (PMC3060696; doi:10.1093/jxb/erq416), 2011-01-14
Supplement: supp_erq416_00055335-file001.pdf [file supp_erq416_00055335-file001.pdf]

**ABC transporters coordinately expressed during lignification of Arabidopsis stems include a set of ABCB's associated with auxin transport**

*Minako Kaneda, Mathias Schuetz, Billy S P Lin, Carolina Chanis, Bjoern Hamburger, Juergen Ehling, Tamara Western, and Lacey Samuels*

**Supplementary Material**

Supplementary Tables S1-S4

Supplementary Figures S1-S4

**Supplemental table 1. TDNA insertion lines and a RNAi list and their polymorphism sites.**

| <b>MIPS locus</b> | <b>ABC transporter</b> | <b>Synonyms</b>    | <b>mutant name</b> | <b>Salk/SAIL TDNA insertions</b> | <b>Polymorphism site</b> |
|-------------------|------------------------|--------------------|--------------------|----------------------------------|--------------------------|
| <b>At1g02520</b>  | <b><i>ABCB11</i></b>   | <i>MDR8/PGP11</i>  | <i>abcb11</i>      | Salk_094249                      | exon                     |
| <b>At1g28010</b>  | <b><i>ABCB14</i></b>   | <i>MDR12/PGP14</i> | <i>abcb14-1</i>    | Salk_016005                      | exon                     |
|                   |                        |                    | <i>abcb14-2</i>    | Salk_026876                      | exon                     |
|                   |                        |                    | <i>abcb14RNAi</i>  |                                  |                          |
| <b>At3g28345</b>  | <b><i>ABCB15</i></b>   | <i>MDR13/PGP15</i> |                    | Salk_121099                      | promoter                 |
|                   |                        |                    | <i>abcb15-1</i>    | WiscDsLox501E11                  | exon                     |
|                   |                        |                    | <i>abcb15-2</i>    | SAIL1187-C04<br>(CS843941)       | exon                     |
|                   |                        |                    |                    | Salk_036868                      | intron                   |
|                   |                        |                    | Salk_034562        | intron                           |                          |
| <b>At3g16340</b>  | <b><i>ABCG29</i></b>   | <i>PDR1</i>        | <i>abcg29</i>      | Salk_113825                      | exon                     |
| <b>At2g37280</b>  | <b><i>ABCG33</i></b>   | <i>PDR5</i>        | <i>abcg33</i>      | Salk_002380                      | exon                     |

**Supplemental table 2. Primer list**

---

|                                 |                |                                                                  |
|---------------------------------|----------------|------------------------------------------------------------------|
| <i>salk_016005/abcb14-1</i>     | Left primer    | 5'-TGGTCAAGTTAGGGAAACCGGA-3'                                     |
|                                 | Right primer   | 5'-GCCCTTGTGAATCTCCTCCAAA-3'                                     |
| <hr/>                           |                |                                                                  |
| <i>salk_026876/abcb14-2</i>     | Left primer    | 5'-CGAGTTTCAGCCGGGAAGAGT-3'                                      |
|                                 | Right primer   | 5'-CCACCCAAGAGTTCTTAATGCGA-3'                                    |
| <hr/>                           |                |                                                                  |
| <i>salk_121099</i>              | Left primer    | 5'-TTTTCTTTTGTGGATTCCTTTG-3'                                     |
|                                 | Right primer   | 5'-TTGTTGTGCGGTGTGGCTTTA-3'                                      |
| <hr/>                           |                |                                                                  |
| <i>WiscDslox501E11/abcb15-1</i> | Left primer    | 5'-GAGTCTAGAGCAAATGGC-3'                                         |
|                                 | Right primer   | 5'-AATGGCTACGAAACTCAG-3'                                         |
| <hr/>                           |                |                                                                  |
| <i>sail_1187-C04/abcb15-2</i>   | Left primer    | 5'-GGACAAGAACAGGGGAGAGAC-3'                                      |
|                                 | Right primer   | 5'-TG TTCAGACTGTTTCATTGTAGACAC-3'                                |
| <hr/>                           |                |                                                                  |
| <i>salk_036868</i>              | Left primer    | 5'-ATTAGAGGCTTTGGCAGCTTC-3'                                      |
|                                 | Right primer   | 5'-TACTGTCTTTGCAGTTGCTGC-3'                                      |
| <hr/>                           |                |                                                                  |
| <i>salk_034562</i>              | Left primer    | 5'-ATTAGAGGCTTTGGCAGCTTC-3'                                      |
|                                 | Right primer   | 5'-TACTGTCTTTGCAGTTGCTGC-3'                                      |
| <hr/>                           |                |                                                                  |
| <i>salk_113825/abcb29</i>       | Left primer    | 5'-CAACGCTGCTTTAAACATTGC-3'                                      |
|                                 | Right primer   | 5'-TCGGACTATTGGGGTTGTTC-3'                                       |
| <hr/>                           |                |                                                                  |
| <i>salk_002380/abcb33</i>       | Left primer    | 5'-TTCCTGGAGTTGCTAAGATCAGAGA-3'                                  |
|                                 | Right primer   | 5'-AGCTGCGACCATGAAGTTTGG-3'                                      |
| <hr/>                           |                |                                                                  |
| TDNA specific primer            | LBa1           | 5'-TGGTTCACGTAGTGGGCCATCG-3'                                     |
|                                 | LBb1           | 5'-GCGTGGACCGCTTGCTGCAACT-3'                                     |
|                                 | sail Lb1       | 5'-GCCTTTTCAGAAATGGATAAATAGCC-3'                                 |
| <hr/>                           |                |                                                                  |
| RNAi vector primers             | Agri 51        | 5'-CAACCACGTCTTCAAAGCAA-3'                                       |
|                                 | Agri 56        | 5'-CTGGGGTACCGAATTCCTC-3'                                        |
|                                 | Agri 64        | 5'-CTTGCGCTG CAGTTATCATC-3'                                      |
|                                 | Agri 69        | 5'-AGGCGTCTCGCATATCTCAT-3'                                       |
| <hr/>                           |                |                                                                  |
| <i>ABCG33/PDR5</i>              | forward primer | 5'-TTT <u>GAA</u> TCGAATTGGACACAGTTTGGCTA-3'                     |
|                                 | reverse primer | 5'-CCAG <u>GAT</u> CCTTCCAAATCTCTGCAAGCTC-3'                     |
|                                 |                | * underlined are BamHI and EcoRI recognition sites, respectively |
| <hr/>                           |                |                                                                  |
| <i>ABCB11/MDR8</i>              | forward primer | 5'-CGG <u>GAA</u> TCGGGAATCGCAAGAAGGTAAG-3'                      |
|                                 | reverse primer | 5'-CGT <u>GAT</u> CCTTCGGCGCTGACAAAAAT-3'                        |
|                                 |                | *underlined are BamHI and EcoRI sites, respectively              |
| <hr/>                           |                |                                                                  |
| <i>ABCB14/MDR12</i>             | forward primer | 5'-TGT <u>GAT</u> CCTTATCACTTTAGCACTGTG-3'                       |
|                                 | reverse primer | 5'-TTAG <u>GAT</u> CCATGGATGGGAATTGATGC-3'                       |
|                                 |                | *underlined are BamHI sites                                      |
| <hr/>                           |                |                                                                  |
| <i>ABCB15/MDR13</i>             | forward primer | 5'-TGT <u>GAT</u> CCGCCTATAAATAAAGTACGTAAGAC-3'                  |
|                                 | reverse primer | 5'-CCC <u>GAT</u> CCTTGTGTGTGTTTAAAGAGACAG-3'                    |
|                                 |                | *underlined are BamHI sites                                      |

---

ABCB13\_RT\_F 5'-CGTCTTACTTCTAGGGTTCG-3'  
ABCB13\_RT\_R 5'-GCCACTGAAGTTGCCCTAGA-3'

---

ABCB14\_RT\_F 5'-ATCCATGCTGAGACCGAAGT-3'  
ABCB14\_RT\_R 5'-AAGATTGCGTCGCTTGAGAT-3'

---

ABCB14\_RT\_F2 5'-TGGTCAAGTTAGGGAAACCGGA-3'  
ABCB14\_RT\_R2 5'-GCGTTCTCGTTCCCATAC-3'

---

ABCB15\_RT\_F 5'-GAGTCTAGAGCAAATGGC-3'  
ABCB15\_RT\_R 5'-AATGGCTACGAAACTCAG-3'

---

ABCG33\_RT\_F 5'-AACATCGGCATATATAAGTC-3'  
ABCG33\_RT\_R 5'-CCTCACAGCTTTGTCTCA-3'

---

ACTIN8\_RT\_F 5'-ATTAAGGTCGTGGCA-3'  
ACTIN8\_RT\_R 5'-TCCGAGTTTGAAGAGGCTAC-3'

---

### Supplemental table 3: Nucleotides matrix in the boxes P, A and L

#### BOX P

| POS | 1  | 2  | 3  | 4  | 5  | 6  | 7  | 8  | 9  | 10 | 11 | 12 | 13 | 14 |
|-----|----|----|----|----|----|----|----|----|----|----|----|----|----|----|
| A   | 2  | 1  | 1  | 2  | 17 | 16 | 0  | 11 | 20 | 13 | 0  | 4  | 4  | 2  |
| T   | 8  | 16 | 14 | 6  | 1  | 0  | 0  | 1  | 3  | 1  | 0  | 1  | 0  | 3  |
| G   | 0  | 0  | 0  | 0  | 0  | 0  | 0  | 0  | 0  | 0  | 0  | 0  | 0  | 0  |
| C   | 13 | 6  | 8  | 15 | 5  | 7  | 23 | 11 | 0  | 9  | 23 | 18 | 19 | 18 |

Number of elements used to build matrix: 23

#### BOX L

| POS | 1  | 2  | 3  | 4  | 5  | 6  | 7  | 8  | 9  | 10 | 11 |
|-----|----|----|----|----|----|----|----|----|----|----|----|
| A   | 2  | 0  | 1  | 1  | 21 | 0  | 0  | 7  | 20 | 1  | 1  |
| T   | 11 | 3  | 17 | 7  | 0  | 2  | 0  | 14 | 0  | 0  | 0  |
| G   | 2  | 0  | 0  | 0  | 0  | 0  | 0  | 0  | 0  | 0  | 0  |
| C   | 6  | 18 | 3  | 13 | 0  | 19 | 21 | 0  | 1  | 20 | 20 |

Number of elements used to build matrix: 21

#### BOX A

| POS | 1  | 2  | 3  | 4  | 5  | 6  |
|-----|----|----|----|----|----|----|
| A   | 1  | 0  | 1  | 0  | 0  | 1  |
| T   | 0  | 2  | 0  | 19 | 4  | 3  |
| G   | 0  | 1  | 15 | 0  | 2  | 0  |
| C   | 18 | 16 | 3  | 0  | 13 | 15 |

Number of elements used to build matrix: 19

Supplemental Table 4. Locus information and gene names used in this study for ABC transporter candidate genes

| Description        | MIPS locus | Synonyms <sup>a</sup> | ABC transporter nomenclature <sup>b</sup> | Correlation with phenylpropanoid gene expression <sup>c</sup> | Epidermal expression pattern <sup>d</sup> | Targeting prediction <sup>e</sup> | P/L/A box <sup>f</sup> | Pattern of expression in stem <sup>g</sup> |
|--------------------|------------|-----------------------|-------------------------------------------|---------------------------------------------------------------|-------------------------------------------|-----------------------------------|------------------------|--------------------------------------------|
| 1 ABC transporter  | At3g28345  | <i>MDR13</i>          | <i>ABCB15</i>                             | positive                                                      | Stem >Epi                                 | Other                             | P                      | High from 3cm to base                      |
| 2 ABC transporter  | At1g02520  | <i>MDR8</i>           | <i>ABCB11</i>                             | positive                                                      | ND                                        | Other                             | P                      | High from 3cm to base                      |
| 3 ABC transporter  | At5g06530  | <i>WBC23</i>          | <i>ABCG22</i>                             | positive                                                      | Stem = Epi                                | Other                             | ND                     | Increasing towards base                    |
| 4 ABC transporter  | At1g59870  | <i>PDR8/PEN3</i>      | <i>ABCG36</i>                             | positive                                                      | Epi >Stem                                 | Chl                               | ND                     | Increase towards base                      |
| 5 ABC transporter  | At5g61690  | <i>ATH15</i>          | <i>ABCA11</i>                             | positive                                                      | ND                                        | Mit                               | ND                     | High in 7-9cm segment                      |
| 6 ABC transporter  | At1g66950  | <i>PDR13</i>          | <i>ABCG39</i>                             | positive                                                      | Epi >Stem                                 | Other                             | A                      | Stem apex only                             |
| 7 ABC transporter  | At3g16340  | <i>PDR1</i>           | <i>ABCG29</i>                             | positive                                                      | Stem > Epi                                | Chl                               | P                      | High at 3-5 cm segment                     |
| 8 ABC transporter  | At2g37280  | <i>PDR5</i>           | <i>ABCG33</i>                             | positive                                                      | Stem>Epi                                  | Other                             | LP                     | Stem apex only                             |
| 9 ABC transporter  | At1g28010  | <i>MDR12</i>          | <i>ABCB14</i>                             | positive                                                      | Stem >Epi                                 | Other                             | AP                     | Stem apex only                             |
| 10 ABC transporter | At2g26910  | <i>PDR4</i>           | <i>ABCG32</i>                             | negative                                                      | Epi>stem                                  | Other                             | ND                     | Decreasing towards base                    |
| 11 ABC transporter | At5g61730  | <i>ATH11</i>          | <i>ABCA9</i>                              | negative                                                      | ND                                        | Mit                               | ND                     | High between 2-5 cm                        |
| 12 ABC transporter | At4g15230  | <i>PDR2</i>           | <i>ABCG30</i>                             | negative                                                      | low                                       | Other                             | A                      | Negative in 3-5cm stem                     |
| 13 ABC transporter | At4g25960  | <i>MDR2</i>           | <i>ABCB2</i>                              | negative                                                      | Epi >Stem                                 | Other                             | AL                     | Negative at base                           |
| 14 ABC transporter | At2g13610  | <i>WBC5</i>           | <i>ABCG5</i>                              | negative                                                      | low                                       | Other                             | ND                     | Negative at base                           |

<sup>a</sup>Arabidopsis ABC protein system by Sanchez-Fernandez et al. 2001

<sup>b</sup>Plant ABC proteins updated nomenclature by Verrier et al. 2008

<sup>c</sup>Expression relative to phenylpropanoid genes.

<sup>d</sup>Data from Suh et al. (2005) Affymetrix "full genome" microarray study of Arabidopsis stem epidermal peel with reference to whole stems.

<sup>e</sup>Aramemnon: web-based targeting prediction program (<http://aramemnon.botanik.uni-koeln.de>)

<sup>f</sup>Presence of P/L and A promoter elements was determined using MotifMapper, presence of motifs is indicated if the motif was present in the 1000 bp promoter region of candidate genes.

<sup>g</sup>Data from Ehlthing et al. (2005) Operon 'longmer' microarray study of Arabidopsis whole stems over a developmental gradient from stem apex to base, with reference to the 0-2 cm apex region prior to lignification.

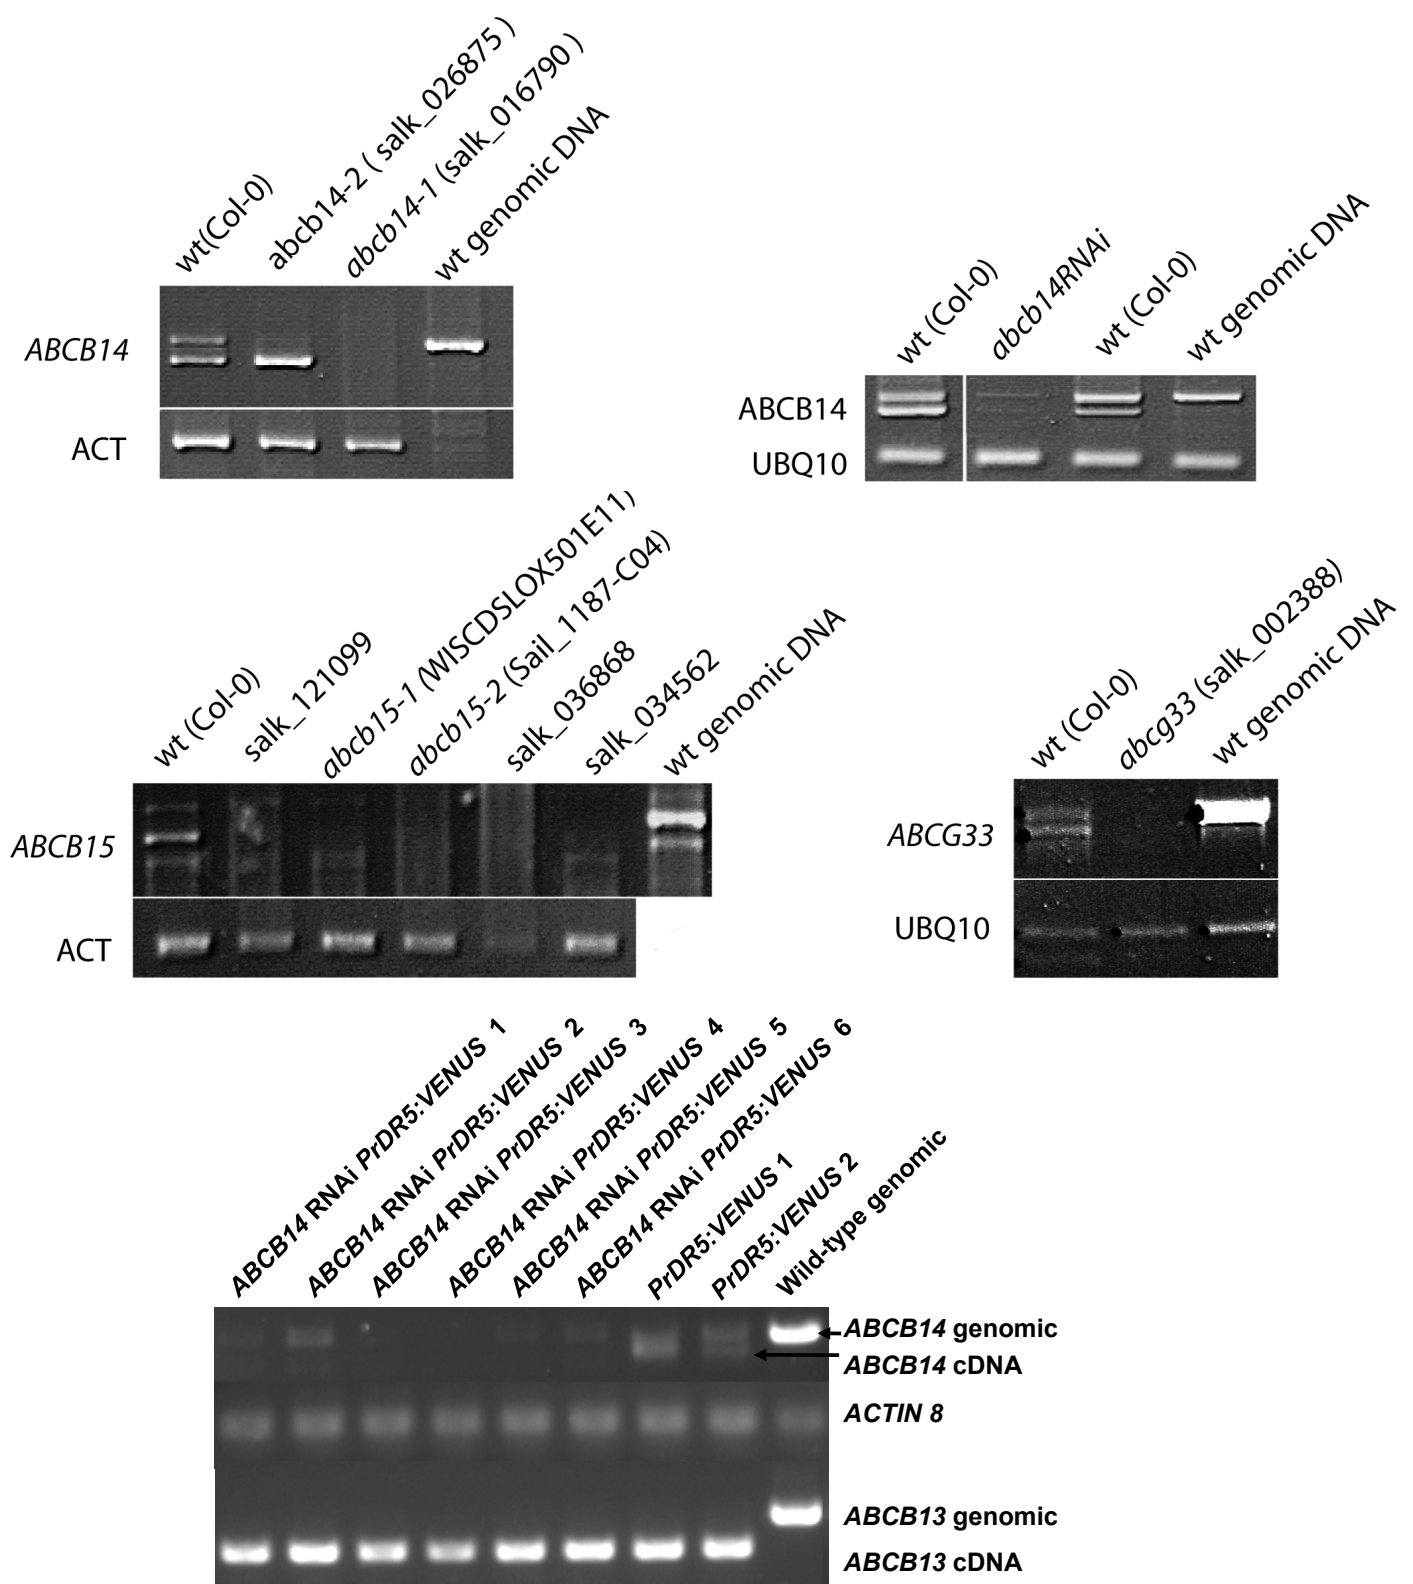

**Supplemental figure 1. Transcriptional level by RT-PCR in ABC transporter candidate gene mutants.**

Transcriptional level of *ABCB14*, *ABCB15* and *ABCG33* were very low or not detected either in *abcb14* RNAi, *abcb14-1*, *abcb15-1*, *abcb15-2* and *abcg33* compared to wild-type Columbia. *ABCB13* amplification in *abcb14* RNAi compared to wild-type plants showed the specificity of the RNAi effect to *ABCB14* transcripts. Actin (ACT) and ubiquitin (UBQ10) amplifications were used as control.

*AtABCG33* promoter::GUS

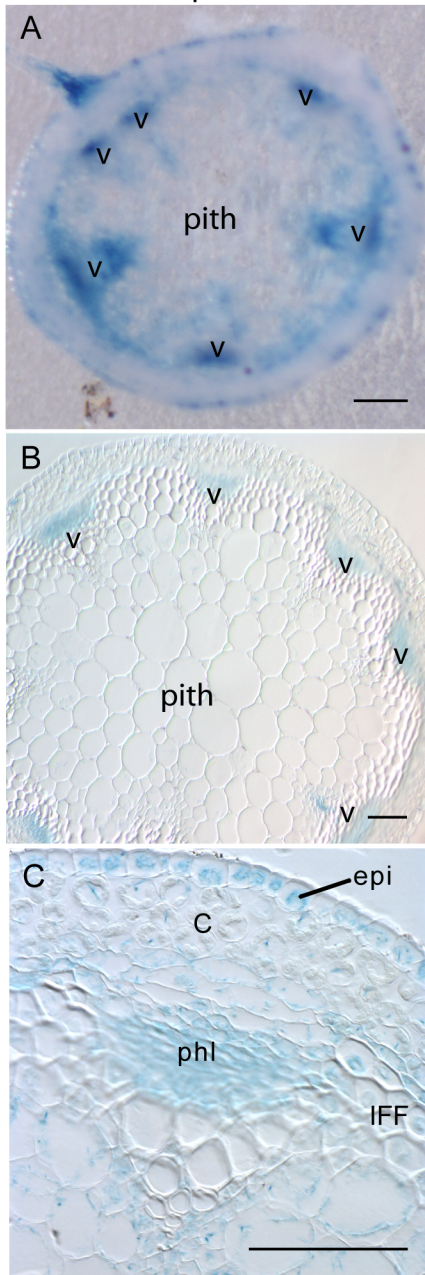

**Supplemental figure 2. Gene expression profiles of candidate ABC transporter genes, *pABCG33::GUS* in stem vasculatures.**

A) Young stem sections, and B) and C) mature stem sections showed constant vasculature (V) specific GUS expression. cortex, epi: epidermal cells, IFF: interfascicular fiber, phl: phloem tissue. Scale bar = 50  $\mu$ m.



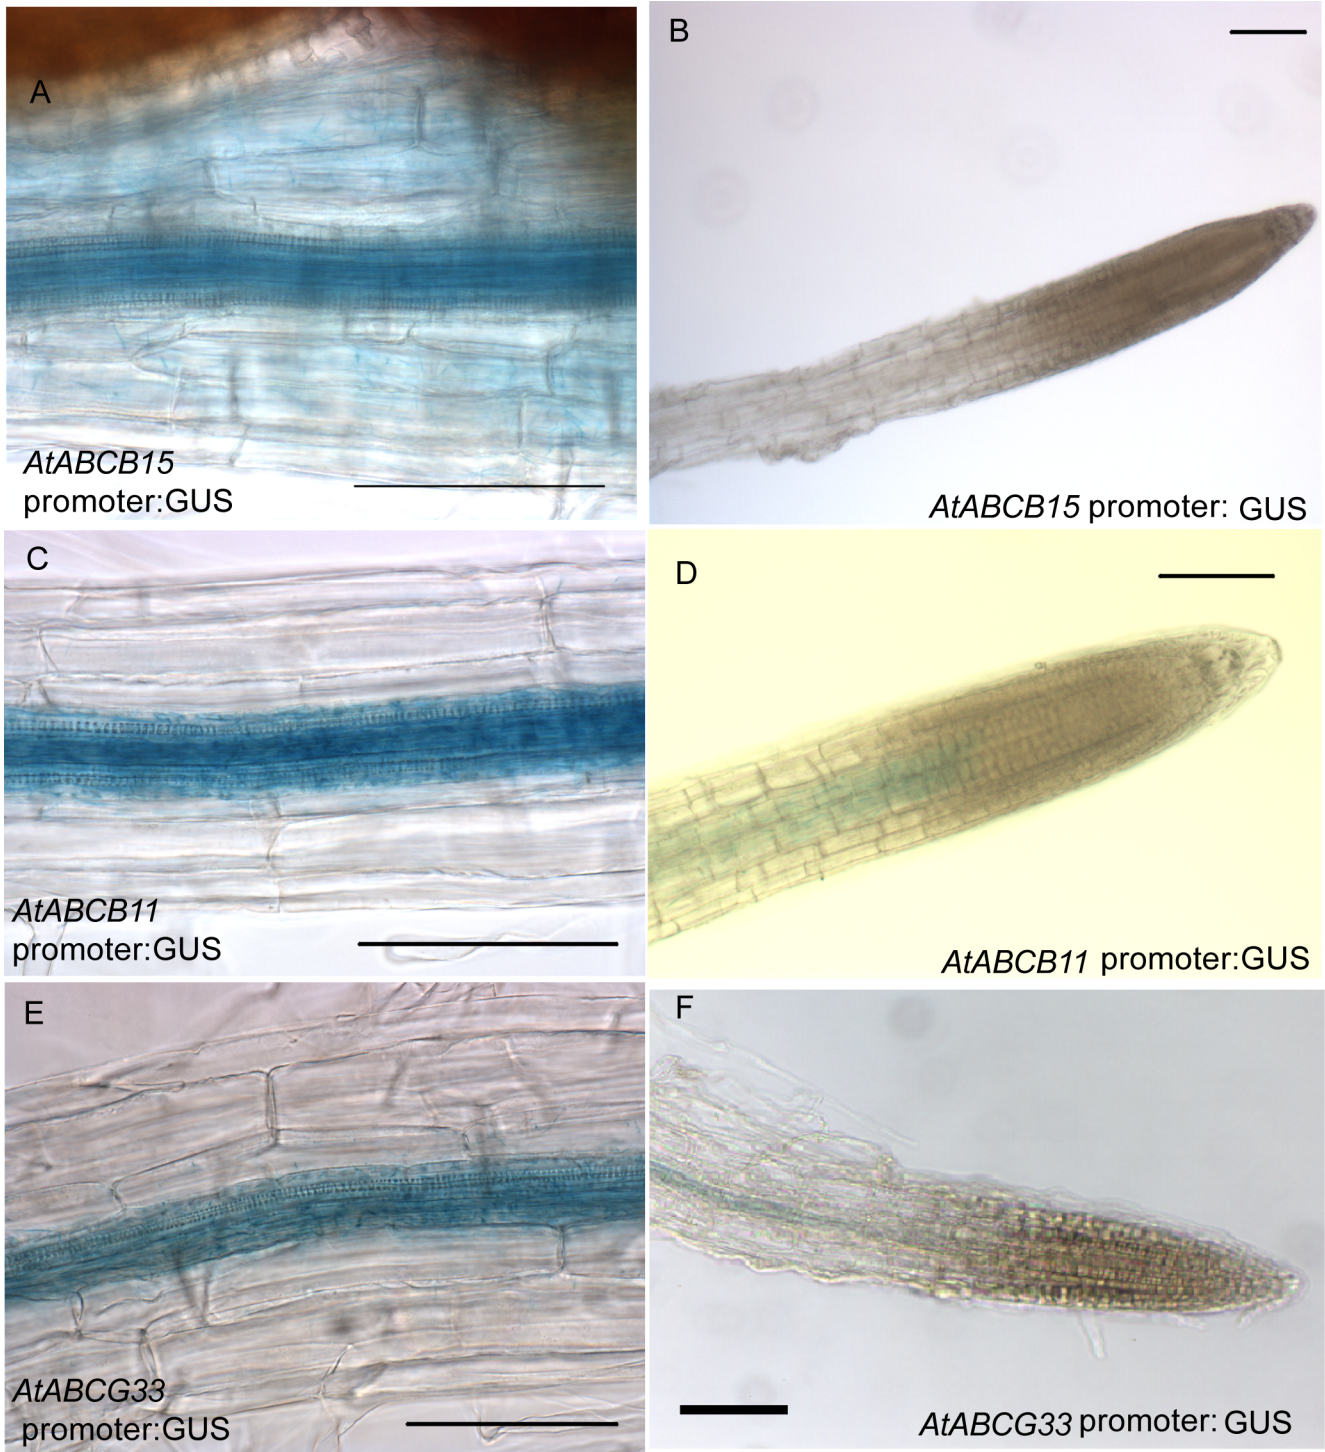

**Supplemental figure 3. GUS expression profiles of candidate ABC transporter gene in seedling root tissue** A) to F) Seedling root of promoter::GUS showed vascular cylinder specific GUS activity but no root tip in all three transporters. Bar = 250 m

### Supplemental figure 4 Protein Alignment used for phylogenetic reconstruction

MDR protein sequences from Arabidopsis were retrieved from 'TAIR' (v9) and aligned using Dialign2 (Morgenstern et al., 2006). Only amino acid positions with more than 40% diagonal similarity are shown, which were used for further analyses. Identical and similar amino acids in more than 50% of all sequences are shaded in dark and light grey, respectively.

|       |        | 10                                   | 20                            | 30           | 40            | 50        | 60       |
|-------|--------|--------------------------------------|-------------------------------|--------------|---------------|-----------|----------|
| MDR1  | ABCB1  | ELFRFADGLDYVLMGIGSVGAFVHGCSLPLFLRF   | FADLALYFLVVGAAIWASSWAEISCW    |              |               |           |          |
| MDR11 | ABCB19 | KLFSFADKFDYLLMFVGSLSGAIIVHGSSMPVFFLL | FGQMSLYFVYLGVLVCFSSYAEIACW    |              |               |           |          |
| MDR10 | ABCB10 | KLFSFADFDYCVLMLALGSIGACIHGASVPVFFIF  | FFGKLSLDFVYLSVVIILFSSWLEVACW  |              |               |           |          |
| MDR2  | ABCB2  | KLFSFADFDYCVLMTLGSVIGACIHGASVPVFFIF  | FFGKLSLDFVYLSVAILFSSWLEVACW   |              |               |           |          |
| MDR12 | ABCB14 | GLFSAADNVDYFLMFLGGLGTCIHGGTLPFFVFF   | FGGMALYLVYLGVLNLSAWIGVACW     |              |               |           |          |
| MDR15 | ABCB13 | GLFSAADKLDYFLMLLGGGLGACIHGATLPLFFV   | FFGKMALYLVYLGVLNLFVSAWIGVSCW  |              |               |           |          |
| MDR14 | ABCB20 | QLFACADRFDWVLMIVGSVAAAAHGTALIVYLHY   | FAKISLTIVYIAGGVFISGWIEVSCW    |              |               |           |          |
| MDR6  | ABCB6  | QLFACADRFDWVLMVFGSVAAAAHGTALIVYLHY   | FAKISLTIVYIAGGVFISGWIEVSCW    |              |               |           |          |
| MDR3  | ABCB3  | KLFSFSDSTDVLLMIVGSIIGANGVGFPLMTLL    | FGDLCLKFVYLGGLGTLGAAFLQVACW   |              |               |           |          |
| MDR5  | ABCB5  | KLFFFSDSTDVLLMIVGSIGAIANGVCSPLMTLL   | FGELCLSLVYLGGLGALGAAFLQVACW   |              |               |           |          |
| MDR16 | ABCB12 | KLFAFADSFDFVLMICGSLGAIIGNVCLPLMTLL   | FGDLCLKFVYLGGLRGLGAAFLQVACW   |              |               |           |          |
| MDR8  | ABCB11 | KLFAFADSSDVLLMICGSIIGANGMSLPLMTLL    | FGDLCLKFVYLGGLGTLGAAFLQVACW   |              |               |           |          |
| MDR17 | ABCB21 | KLFAFADSFDIILMILGTIGAVGNLGFPIMTIL    | FGDVALKFVYLGGLGTLVAALLQVSGW   |              |               |           |          |
| MDR4  | ABCB4  | KLFAFADSFDFLLMILGTLSIGNLGFPLMTLL     | FGDLALKFVWLGIGTFAAAFLQLSGW    |              |               |           |          |
| MDR9  | ABCB9  | KLFSFADKTDVVLMTVGTIAAANGNLTQPFMTL    | IFGQLAVKFIYLAAYAGVVSFLQVSCW   |              |               |           |          |
| MDR7  | ABCB7  | KLFTFADRYDIVLMVIGTISAMANGLTQPFMS     | IILMGQLAVKELYLAAYAGVVSFLQVSCW |              |               |           |          |
| MDR19 | ABCB17 | SIFMHADGVDWILMALGLIGAVDGFITPVVVF     | IENTLVVALLYVACGSWVICFLEGYCW   |              |               |           |          |
| MDR20 | ABCB18 | SIFMHADGVDWMLMALGLIGAVDGFITPIIFFI    | CSKLAVALVYVACASWVICFLEGYCW    |              |               |           |          |
| MDR18 | ABCB16 | SIFMHADGVDWMLMGLGLIGAVDGFITPIILFF    | ITAMLALAMLYVACASWVICFLEGYCW   |              |               |           |          |
| MDR13 | ABCB15 | SIFMHADGVDWLLMGLGLIGAVDGFITPLVLL     | LITSKLSVALLYVACGSWVVCFLEGYCW  |              |               |           |          |
|       |        | 70                                   | 80                            | 90           | 100           | 110       | 120      |
| MDR1  | ABCB1  | MWSGERQTTKMR                         | IKYLEAALNQDIQ                 | FFDTEVRTSDVV | FAINTDAVMVQDA | ISEKLGNF  | IH       |
| MDR11 | ABCB19 | MYSGERQVAALR                         | KKYLEAVLQKDV                  | GFDDTARTGD   | DIVFSVSTDTLL  | VQDAISEK  | VGNFIH   |
| MDR10 | ABCB10 | MHTGERQAAKIR                         | KAYLRSMISQDIS                 | LSLFDTEIST   | GEVISAITSEI   | LVVQDA    | ISEKVG   |
| MDR2  | ABCB2  | MHTGERQAAKMR                         | RAYLRSMISQDIS                 | LSLFDTEAST   | GEVISAITSD    | ILVVQD    | ALSEKVG  |
| MDR12 | ABCB14 | MOTGERQTARLR                         | INYLKSIILAKD                  | ITFFDTEARDS  | NFIHFHISSD    | AILVQDA   | IGDKTGH  |
| MDR15 | ABCB13 | MOTGERQTARLR                         | INYLKSIILAKD                  | ITFFDTEARDS  | NLIHFHISSD    | AILVQDA   | IGDKTDH  |
| MDR14 | ABCB20 | IILTGERQTA                           | VIIRSKYVQVLL                  | NQDMSFFD     | TYGNGDIVSQV   | LSDVLLIQ  | SALSEKVG |
| MDR6  | ABCB6  | IILTGERQTA                           | VIIRSKYVQVLL                  | NQDMSFFD     | TYGNGDIVSQV   | LSDVLLIQ  | SALSEKVG |
| MDR3  | ABCB3  | MITGERQAARIR                         | SLYLKTIILRQD                  | IGFFDVEIT    | STGEVVGRMSG   | DTVLILE   | AMGEKVG  |
| MDR5  | ABCB5  | MITGERQAARIR                         | SLYLKTIILRQD                  | IGFFDVEIT    | STGEVVGRMSG   | DTVLILD   | AMGEKVG  |
| MDR16 | ABCB12 | MITGERQAAKIR                         | SNYLKTIILRQD                  | IGFFDVEIT    | STGEVVGRMSG   | DTVHIIQ   | DAMGEKVG |
| MDR8  | ABCB11 | MITGERQAARIR                         | STYLKTIILRQD                  | IGFFDVEIT    | STGEVVGRMSG   | DTVLIQ    | DAMGEKVG |
| MDR17 | ABCB21 | MISGERQAGRIR                         | SLYLQTIILRQD                  | IAFFDVEIT    | NTGEVVGRMSG   | DTVLIQ    | DAMGEKVG |
| MDR4  | ABCB4  | MISGERQAARIR                         | SLYLKTIILRQD                  | IAFFDIDT     | NTGEVVGRMSG   | DTVLIQ    | DAMGEKVG |
| MDR9  | ABCB9  | MVTGERQSATIR                         | GLYLKTIILRQD                  | IGYFDTE      | TNTGEVIGRMSG  | DTVLIQ    | DAMGEKVG |
| MDR7  | ABCB7  | MVTGERQSTRIR                         | RLYLKTIILRQD                  | IGFFDTE      | TNTGEVIGRMSG  | DTVLIQ    | DSMGEKVG |
| MDR19 | ABCB17 | TRTGERQAARM                          | REKYLRAVLRQD                  | VGYFDLHVT    | SSDVITSSD     | SLVIQDF   | LSEKLPN  |
| MDR20 | ABCB18 | TRTGERQAARM                          | REKYLKAVLRQD                  | VGYFDLHVT    | SSDVITSSD     | SLVIQDF   | LSEKLPN  |
| MDR18 | ABCB16 | TRTGERQAARM                          | REYLRRAVLRQD                  | VGYFDLHVT    | SSDIITSSD     | SLVIQDF   | LSEKLPN  |
| MDR13 | ABCB15 | TRTGERQTAARM                         | REKYLRAVLRQD                  | VGYFDLHVT    | SSDVITSSD     | SFVIQDF   | LSEKLPN  |
|       |        | 130                                  | 140                           | 150          | 160           | 170       | 180      |
| MDR1  | ABCB1  | YMATFVSGFIV                          | GFTAVWQIALV                   | TLAVVPLIAV   | IGSQESLSQ     | AGNIVEQ   | TVVQIRV  |
| MDR11 | ABCB19 | YLSFIFLAGLV                          | VGFVSAWKLALL                  | SVAVIPGIA    | FAGSRESYAN    | AGVIAEQAI | AQVRTV   |
| MDR10 | ABCB10 | FISRFIAGFAI                          | GFAVWQISLV                    | TLSIVPLIAL   | AGVRSYVKA     | NEIAEEVI  | GNVRTV   |
| MDR2  | ABCB2  | YISRFIAGFAI                          | GFTSVWQISLV                   | TLSIVPLIAL   | AGVRSYIK      | AEEVIGN   | VRTVQA   |
| MDR12 | ABCB14 | YLCQFIAGFV                           | IGFLSVWQLT                    | LLTLGVVPL    | IAIAGSEAA     | YADAGKVA  | EEVMSQ   |
| MDR15 | ABCB13 | YLSQFIAGFV                           | IGFLSVWQLT                    | LLTLGVVPL    | IAIAGSETA     | YADAGKVA  | EEVMSQ   |
| MDR14 | ABCB20 | NMATFISGLV                           | IGFVNCWEI                     | ALITLATG     | PPIVAAGIQ     | DAYAEA    | AGIAEQAI |

MDR6 ABCB6 NMFATFISGLIIGFVNCWEIALITLATGPFIVAAGIQDAYAEAASIAEQAVSYVRTLYAFT  
MDR3 ABCB3 LIATFVGGFVLAFLVKGWLLTLVMLVSIPLLAIAAGEQAAYAKASTVVEQTLGSIRTVASFT  
MDR5 ABCB5 LISTFVGGFVIAFLRGLWLLTLVMLTISIPLLAMSGEQAAAYAKASNVEQTLGSIRTVASFT  
MDR16 ABCB12 LVSTFVGGFALAFAGKGLWLLTLVMLTISIPLLAMAGGQAAAYAKAATVVEQTLGSIRTVASFT  
MDR8 ABCB11 LVSTFVGGFVLAFLIKGWLLTLVMLTISIPLLAMAGGQAAAYAKAATVVEQTLGSIRTVASFT  
MDR17 ABCB21 LVSTFIGGFVIAFTEGWLLTLVMVSSIPLLVMSGGQTSYAKAAVVEQTVGSIIRTVASFT  
MDR4 ABCB4 LLATFVGGFVIAFVRGWLLTLVMLSSIPLLVMSGGQTSYAKAATVVEQTLGSIRTVASFT  
MDR9 ABCB9 LLCTFVGGFALAFYKGPLLAGVLCSCIPLIVIAAGQVAYAEAGNVVEQTVGAIRTVVAF  
MDR7 ABCB7 LVSSFVGGFVIAFIVGMKLTALLPCVPLIVGTGVQLAYTEAGNVVQAVGSIIRTVVAFT  
MDR19 ABCB17 NASAFVASYIVSFIILMWRLTIVGFPFIILLVLPGIHEQYNEAGSIAEQATSSVRTVYAFG  
MDR20 ABCB18 NTSAFVASYIVGFLLLWRLTIVGFPFIILLVLPGIREEYNEAGSIAEQVSSVRTVYAFG  
MDR18 ABCB16 NASAFVGSYIVGFMLLWRLTIVGFPFIILLVLPGIREEYNEAGSIAEQATSSVRTVYAFV  
MDR13 ABCB15 SASTFVGSYIVGFILLWRLAIVGLPFIILLVLPGIREEYNEAGFVAEQATSSVRTVYAFS

190 200 210 220 230 240

MDR1 ABCB1 GESRASQAYSSALKIAQKLGKYGTLAKGMGLGATYFVVFCCYALLLWYGGYLVRRHHLTNG  
MDR11 ABCB19 GESKALNAYSDAIQYTLKLGKGMAGKGLGLGCTYGIACMSWALVFWYAGVFIKNGQTDG  
MDR10 ABCB10 GEEKAVSSYQGAALRNTYNYGRKAGLAKGLGSLHFLVFLSWALLIWFTSIVVHKGIANG  
MDR2 ABCB2 GEERAVRLYREALENTYKYGRKAGLTKGLGLGSMHCVLFLSWALLVWFTSVVVHKDIADG  
MDR12 ABCB14 GEEKAVKSYNSLKKALKSKRSGLAKGLVGLTYSLLFCAWALLFWYASLLVRHGKTING  
MDR15 ABCB13 GEEKAVKSYNSLKKALKSKRSGLAKGLVGLTYSLLFCAWALLLWYASLLVRHGKTING  
MDR14 ABCB20 NETLAKYSYATSLQATLRYGILISLVQGLGLGFTYGLAICSCALQLWIGRFFVHNGRANG  
MDR6 ABCB6 NETLAKYSYATSLQATLRYGILISLVQGLGLGFTYGLAICSCAMQLWIGRFFVIHHRANG  
MDR3 ABCB3 GEKQAMKSYREFINLAYRASVKQGFMSGLGLGVVFFVFFCSYALAIWFGGEMILKKGTYG  
MDR5 ABCB5 GEKQAMSSYKELINLAYKSNVKQGFVTGLGLGVMFLVFFSTYALGTWFGGEMILRKGTYG  
MDR16 ABCB12 GEKQAINSYKKYITSAYKSSIQQGFSTGLGLGVMFYVFFSSYALAIWFGGKMLEKGYTG  
MDR8 ABCB11 GEKQAINSYKKFITSAYKSSIQQGFSTGLGLGVMFFVFFSSYALAIWFGGKMLEKGYTG  
MDR17 ABCB21 GEKQAINSYNKHLVSAYRAGVFEGASTGLGLGTLNIVIFCTYALAVWYGGKMLEKGYTG  
MDR4 ABCB4 GEKQAINSYNKHLVTAYKAGVIEGGSTGLGLGTLFLVVFCSYALAVWYGGKMLLDKGYTG  
MDR9 ABCB9 GEKQATEKYESKLEIAYKTVVQOGLISGFLGTLMAVIFCSYGLAVWYGAKLIMDKYNG  
MDR7 ABCB7 GEKQSMGKYEKKLEIAYKSMVKQGLYSGLGIGIMMVVYCTYGFYIWIYGARQIIEKGYTG  
MDR19 ABCB17 SENKMIGKFSTALRGSVKLGLRQGLAKGITIGSN-GVTHAIWAFWLTWYGSRLVMNHGSKG  
MDR20 ABCB18 SEKKMIEKFSTALQGSVKLGLRQGLAKGIAIGSN-GITYAIWGFWLTWYGSRMVMNHGSKG  
MDR18 ABCB16 SEKKMIEKFSDALQGSVKLGLRQGLAKGIAIGSN-GIVYAIWGFWLTWYGSRMVMNYGYKG  
MDR13 ABCB15 GERKTIKSFSTALQGSVKLGIKQGLAKGITIGSN-GITFAMWGFMSWYGSRMVMYHGAQG

250 260 270 280 290 300

MDR1 ABCB1 GLAIATMFAMVIGGLALGQSAPSMFAFAKAKVAAAKIFRIIDHKPTIERNSESGVELDSV  
MDR11 ABCB19 GKAFATAI FSAIVGGMSLQGSFNSLGAFAKGAAGYKLMIEINQRPTIIQDPLDGKCLDQV  
MDR10 ABCB10 GESFTTMLNVVIAGLSLGQAAPDISTFMRAAAAAYPIFQMIER---NTEDKTGRKLGNV  
MDR2 ABCB2 GKSFTTMLNVVIAGLSLGQAAPDISAFVRAKAAAAYPIFKMIERNVTVTKTSAKSGRKLKGV  
MDR12 ABCB14 AKAFITILNVIYSGFALGQAVPSLSAISKGRVAAAANIFKMIEN---NNLENGTTLQNV  
MDR15 ABCB13 AKAFITILNVIYSGFALGQAAPLSAISAKGRVAAAANIFRMIEN---NNSLDEGTTLQNV  
MDR14 ABCB20 GEIIAALFAVILSGLGLNQAATNFYSFDQGRIAAYRLFEMITRSSSVA--NQEGAVLASV  
MDR6 ABCB6 GEIITALFAVILSGLGLNQAATNFYSFDQGRIAAYRLFEMISR---S--NQEGIILSAV  
MDR3 ABCB3 GEVVNVMTVVASSMSLQGTTFCLTAFAAGKAAAAYKMFETIERKPSIDAFDLNGKVLEDI  
MDR5 ABCB5 GAVINVMVTVVSSSIALGQASEPCLTAFTAGKAAAAYKMFETIEREPLIDTFDLNGKVLEDI  
MDR16 ABCB12 GSVINVIIIVVAGSMSLQGTSPCVTAFAAGQAAAAYKMFETIKRKPLIDAYDVNGKVLGDI  
MDR8 ABCB11 GAVINVIIIVVAGSMSLQGTSPCVTAFAAGQAAAAYKMFETIKRKPLIDAYDVNGKVLEDI  
MDR17 ABCB21 GQVLIIFAVLTGMSLQGTSPCLSAFAAGQAAAAYKMFETIKRKPEIDASDTTGKVLDDI  
MDR4 ABCB4 GQVLNIIIFAVLTGMSLQGTSPCLSAFAAGQAAAAYKMFETIERRPNIDSYSTNGKVLDDI  
MDR9 ABCB9 GQVINVIIFAVLTGMSLQGTSPSLNFAAGRAAAAFKMFETIKRSPKIDAYDMSGVLEDI  
MDR7 ABCB7 GQVMNVIITSLTGGMALGQTLPSLNSFAAGTAAAAYKMFETIKRKPKIDAYDMSGVLEEI  
MDR19 ABCB17 GTVFVVISCIITYGGVSLGQSLSNLKYFSEAFVAVWERILEVIVKRPDIDSNKKEGQILERM  
MDR20 ABCB18 GTVSSVIVCVTFGGTSLGQSLSNLKYFSEAFVAVGERIMKVINRVPIDSDNLEGOILEKT  
MDR18 ABCB16 GTVSTVTVCVTFGGTALGQALSNLKYFSEAFVAVGERIQKMIKRPDIDSDNLNGHILETI  
MDR13 ABCB15 GTVFAVAATAIGGVSLGGLSNLKYFFEAAVSVGERIMEVINRVPKIDSDNPDGHKLEKI

310 320 330 340 350 360

MDR1 ABCB1 TGLVELKNVDFSYPSRPDKLNNFCLSVFAGKTIALVGS SSGSKSTVVSlierfyDpns

|       |        |                                                                  |
|-------|--------|------------------------------------------------------------------|
| MDR11 | ABCB19 | HGNIEFKDVTFSYPSRPDVMIFRNFNIFFPSGKTVAVVGSGSGKSTVVS LIERFYDPNS     |
| MDR10 | ABCB10 | NGDILFKDVTFTYPSRPDVVIFDKLNFVIPAGKVVALVVGSGSGKSTMIS LIERFYEPD     |
| MDR2  | ABCB2  | DGHIQFKDATFSYPSRPDVVIFDRLNLAI PAGKIVALVVGSGSGKSTVIS LIERFYEPIS   |
| MDR12 | ABCB14 | VGKIEFCGVSFAYPSRPNMV-FENLSFTIHS GKTFAFVGPSSGSGKSTIISMVQRFYEPRS   |
| MDR15 | ABCB13 | AGRIEFQKVSFAYPSRPNMV-FENLSFTIHS GKTFAFVGPSSGSGKSTIISMVQRFYEPNS   |
| MDR14 | ABCB20 | QGNIEFRNVYFSYLSRPEIPIILSGFYLTVP AKKAVALVGRNGSGKSSIIPLMERFYDPDPTL |
| MDR6  | ABCB6  | QGNIEFRNVYFSYLSRPEIPIILSGFYLTVP AKKAVALVGRNGSGKSSIIPLMERFYDPDPTL |
| MDR3  | ABCB3  | RGEIELRDVCFSYPARPMEEVFGGFSLLI PSGATAALVGE SSGSGKSSVIS LIERFYDPSS |
| MDR5  | ABCB5  | RGEIELRDVCFSYPARPKEEVFGGFSLLI PSGTTTALVGE SSGSGKSTVIS LIERFYDPNS |
| MDR16 | ABCB12 | RGDIELKDVHFSYPARPDEEIFDGFSLFIPSG ATAALVGE SSGSGKSTVIN LIERFYDPKA |
| MDR8  | ABCB11 | RGDIELKDVHFSYPARPDEEIFDGFSLFIPSG ATAALVGE SSGSGKSTVIS LIERFYDPKS |
| MDR17 | ABCB21 | RGDIELNNVNFSYPARPEEQIFRGFSLIS SSGSTVALVQSGSGKSTVVS LIERFYDPOS    |
| MDR4  | ABCB4  | KGDIELKDVYFTYPARPDEQIFRGFSLFIS SGTVALVQSGSGKSTVVS LIERFYDPQA     |
| MDR9  | ABCB9  | RGDIELKDVYFRYPARPVDQIFAGFSLFV PNGKTVALVQSGSGKSTVIS LIERFYDPES    |
| MDR7  | ABCB7  | KGDIELRDVYFRYPARPVDQIFVGFSLTV PNGMTVALVQSGSGKSTVIS LIERFYDPES    |
| MDR19 | ABCB17 | KGEVEFNHVKFTYLSRPETTIFDDLCLKI PAGKTVALVVGSGSGKSTVISL LQRFYDPIA   |
| MDR20 | ABCB18 | RGEVEFNHVKFTYPSRPETPIFDDLCLRV PSGKTVALVVGSGSGKSTVISL LQRFYDPIA   |
| MDR18 | ABCB16 | RGEVEFNHVCKYPSRPETLIFDDLCLKI PS GKTVALVVGSGSGKSTVISL LQRFYDPNE   |
| MDR13 | ABCB15 | RGEVEFNHVKEVYPSRLETIFDDFCLRV PSGKTVALVVGSGSGKSTVISL LQRFYDPLA    |

370 380 390 400 410 420

|       |        |                                                                         |
|-------|--------|-------------------------------------------------------------------------|
| MDR1  | ABCB1  | ..... ..... ..... ..... ..... ..... ..... ..... ..... ..... ..... ..... |
| MDR11 | ABCB19 | GQVLLDGGDLKTLKLRWLRQOIGLVSQEPALFATS IKENILLGRPDADQVEIEEAAARVAN          |
| MDR10 | ABCB10 | GAVMLDGNDIRYLDLKWLRGHIGLVNQEPALFATT ILENILYGKPDATMVEVEAAAASAN           |
| MDR2  | ABCB2  | GAVLLDGNNISLIDIKWLRGOIGLVNQEPALFATT IRENILYGKDDATAEEITRAAKLSE           |
| MDR12 | ABCB14 | GEILLDGNDIKNLKLKWLREOMGLVSQEPALFATT IASNILLGKEKANMDQIEEAAKAAN           |
| MDR15 | ABCB13 | GEILLDGNDIKSLKWKWFREQLGLVSQEPALFATT IASNILLGKENANMDQIEEAAKAAN           |
| MDR14 | ABCB20 | GEVLLDGENIKNLKLEWLRQIGLVTQEPALLSLS IRENIAAYGRD-ATLDQIEEAAKNAH           |
| MDR6  | ABCB6  | GEVLLDGENIKNLKLEWLRQIGLVTQEPALLSLS IRENIAAYGRD-ATLDQIEEAAKKAH           |
| MDR3  | ABCB3  | GSVLLIDGVNLKEFQLKWIRSKIGLVSQEPVLFSS SIMENIGYGKENATVEEIQAAAKLAN          |
| MDR5  | ABCB5  | GQVLDIDGVDLKEFQLKWIRSKIGLVSQEPVLFSS SIMENIGYGKEGATVEEIQAAKLAN           |
| MDR16 | ABCB12 | GEVLDIDGINLKEFQLKWIRSKIGLVCQEPVLFSS SIMENIAYGKENATLQEIKVATELAN          |
| MDR8  | ABCB11 | GAVLDIDGVNLKEFQLKWIRSKIGLVSQEPVLFSS SIMENIAYGKENATVEEIKAAATELAN         |
| MDR17 | ABCB21 | GEVRIIDGINLKEFQLKWIRSKIGLVSQEPVLFSS IKENIAYGKENATVEEIRKATELAN           |
| MDR4  | ABCB4  | GDVLDIDGINLKEFQLKWIRSKIGLVSQEPVLF TASIKNIAYGKEDATTEEIKAAAELAN           |
| MDR9  | ABCB9  | GQVLDIDNIDLKKLQKWLWIRSKIGLVSQEPVLF ATTIKENIAYGKEDATDQEI RTAIELAN        |
| MDR7  | ABCB7  | GEVLDIDGLDILKKEFQVKKWIRSKIGLVSQEP ILFATTIRENIVYGGKEDASDQEI RTALKLAN     |
| MDR19 | ABCB17 | GEILIDGVSIDKLQVNWLRQMGMLVSQEPVLFATS ITENILFGKEDASLDEVVEAAKASN           |
| MDR20 | ABCB18 | GEILIDGLPINKLQVNWLRQMGMLVSQEPVLFATS IKENILFGKEDASMDDEVVEAAKASN          |
| MDR18 | ABCB16 | GDILIDSVSINNMQVWLRQMGMLVSQEPVLFATS IKENILFGKEDASFDEVVEAAKASN            |
| MDR13 | ABCB15 | GEILIDGVSIDKLQVNWLRQMGMLVSQEPALFATT IKENILFGKEDASMDDEVVEAAKASN          |

430 440 450 460 470 480

|       |        |                                                                         |
|-------|--------|-------------------------------------------------------------------------|
| MDR1  | ABCB1  | ..... ..... ..... ..... ..... ..... ..... ..... ..... ..... ..... ..... |
| MDR11 | ABCB19 | AHSFI IKLPDGFDTQVGERGLQLSGGQKQRIAI ARAMLKNEPAILLLDEATSALDSESEKL         |
| MDR10 | ABCB10 | AHSFITLLPKGYDTQVGERGVQLSGGQKQRIAI ARAMLKDPKAILLLDEATSALDASSESI          |
| MDR2  | ABCB2  | AISFINNLPPEGFETQVGERGIQLSGGQKQRIAI SRAIVKNPISILLLDEATSALDAESEKI         |
| MDR12 | ABCB14 | AISFINNLPPEGFETQVGERGIQLSGGQKQRIAI SRAIVKNPISILLLDEATSALDAESEKS         |
| MDR15 | ABCB13 | ADSFIKSLPNGYNTQVGEGETQLSGGQKQRIAI ARAVLRNPKAILLLDEATSALDAESEKI          |
| MDR14 | ABCB20 | ADSFIKSLPNGYNTQVGEGETQLSGGQKQRIAI ARAVLRNPKAILLLDEATSALDAESEKI          |
| MDR6  | ABCB6  | AHTFISSLEKGYETQVGRAGLAMTEEQKIKLSI ARAVLLNPTIILLLDEVITGGLDFAERI          |
| MDR3  | ABCB3  | AHTFISSLEKGYETQVGTGLTLTEEQKIKLSI ARAVLLDPTIILLLDEVITGGLDFAERV           |
| MDR5  | ABCB5  | AANFIDKLPRLGLETLVGEHGTQLSGGQKQRIAI ARAILKDPRIILLLDEATSALDAESERV         |
| MDR16 | ABCB12 | AAKFIDKLPQGLDTPVGEHGTQLSGGQKQRIAI ARAILKDPRIILLLDEATSALDTESERV          |
| MDR8  | ABCB11 | AAKFIDKLPQGLDTPVGEHGTQLSGGQKQRIAI ARAILKDPRIILLLDEATSALDAESERV          |
| MDR17 | ABCB21 | ASKFIDKLPQGLDTPVGEHGTQLSGGQKQRIAI VARAILKDPRIILLLDEATSALDAESERI         |
| MDR4  | ABCB4  | ASKFVDKLPQGLDTPVGEHGTQLSGGQKQRIAI VARAILKDPRIILLLDEATSALDAESERV         |
| MDR9  | ABCB9  | AAKFIDKLPQGLDTPVGEHGTQMSGGQKQRIAI ARAILKPNPKAILLLDEATSALDAESERI         |
| MDR7  | ABCB7  | ASNFIIDKLPQGLDTPVGEHGTQLSGGQKQRIAI ARAILKPNPKAILLLDEATSALDAESERI        |
| MDR19 | ABCB17 | AHTFISQFPPLGYKTQVGERGVQMSGGQKQRIAI ARAILKSPKAILLLDEATSALDSESERV         |
| MDR20 | ABCB18 | AHSFISQFPNSYQTQVGERGVQLSGGQKQRIAI ARAILKSEPIILLLDEATSALDSESERV          |

MDR18 ABCB16 AHNFI SQP HGYQTQVGERGVHMSGGQKQRIAIARALIKSPIILLLDEATSALDLESERV  
MDR13 ABCB15 AHNFI SQLPNGYETQVGERGVQMSGGQKQRIAIARAIKSPITILLLDEATSALDSESERV

490 500 510 520 530 540

....|....|....|....|....|....|....|....|....|....|....|....|....|  
MDR1 ABCB1 VQEALDRFMIGRTTLIIAHLRSTIRKADLVAVLQQGSVSEIGTHDELFSKGENGVYAKLI  
MDR11 ABCB19 VQEALDRVMVGRTTVVVAHRLCTIRNVDSIAVIQQGQVETGTHEELIAKS--GAYASLI  
MDR10 ABCB10 VQEALDRVMVGRTTVVVAHRLSTVRNADIIAVVGGGKIIESGSHDELISNP-DGAYSSLL  
MDR2 ABCB2 VQEALDRVMVGRTTVVVAHRLSTVRNADIIAVVHEGKIVEFGNHENLISNP-DGAYSSLL  
MDR12 ABCB14 VQQALDNVMEKRTTIVIAHLRSTIRNVDKIVVLRDQGVRETGSHSELI SRG--GDYATLV  
MDR15 ABCB13 VQQALDNVMEKRTTIVVAHRLSTIRNVDKIVVLRDQGVRETGSHSELM LRG--GDYATLV  
MDR14 ABCB20 VQEALDLLMLGRSTIIIIARRLSLIKNADYIAVMEEGQLVEMGTHDELINLG--GLYAELL  
MDR6 ABCB6 VQEALDLLMLGRSTIIIIARRLSLIRNADYIAVMEEGQLLEMGTHDELINLG--NLYAELL  
MDR3\_ ABCB3 VQEALDRVMSRRTTVIVAHRLSTVRNADMIAVIHRGKIVEEGSHSELLKDH-EGAYAQLI  
MDR5 ABCB5 VQEALDRIMVNRTTVIVAHRLSTVRNADIIAVIHRGKIVEEGSHSELLKDH-EGAYSQLL  
MDR16 ABCB12 VQEALDRVMVNRTTVVVAHRLSTVRNADMIAVIHSGKMVEKGSHELLKDS-VGAYSQLI  
MDR8 ABCB11 VQEALDRVMVNRTTVIVAHRLSTVRNADMIAVIHRGKMVEKGSHELLKDS-EGAYSQLI  
MDR17 ABCB21 VQEALDRIMVNRTTVVVAHRLSTVRNADMIAVIHQGKIVEKGSHELLRDP-EGAYSQLI  
MDR4 ABCB4 VQEALDRIMVNRTTVVVAHRLSTVRNADMIAVIHQGKIVEKGSHELLKDP-EGAYSQLI  
MDR9 ABCB9 VQDALVNLMSRRTTVVVAHRLTTIRTADVIAVVHQGKIVEKGT HDEMIQDP-EGAYSQLV  
MDR7 ABCB7 VQDALVKMLSRRTTVVVAHRLTTIRTADMIAVVQGGKIVEKGT HDEMIKDP-EGTYSQLV  
MDR19 ABCB17 VQESLDNASIGRTTIVIAHLRSTIRNADVICVIHNGQIVETGSHEELLKRI-DGQYTSLV  
MDR20 ABCB18 VQEALDNASIGRTTIVIAHLRSTIRNADVICVHNGRIIETGSHEELLEKL-DGQYTSLV  
MDR18 ABCB16 VQEALDNASVGRRTTIVIAHLRSTIRNADICVLHNGCIVETGSHDKLMEID--GKYTSLV  
MDR13 ABCB15 VQEALENASIGRTTILIIAHLRSTIRNADVISVVKNGHIVETGSHDELMEI-DGQYSTLV

550 560 570 580 590 600

....|....|....|....|....|....|....|....|....|....|....|....|....|  
MDR1 ABCB1 KMQMNSPEWKYALLGSGVSVICGSLSAFFAYVIDKYCYLLIGLSSAALVFNTLQHSFWDI  
MDR11 ABCB19 RFQLNSPEWPYSIMGAVGSIILSGFIGPTFAIVTKEYVFIYIGAGLYAVGAYLIQHTFFSI  
MDR10 ABCB10 RIQMIRPDWKYGLCGTLGSIAGSQMPLFALGVKRISILEFCGGSVITVIVHTIEHTTFGI  
MDR2 ABCB2 RLQMIRPDWYGVCGTICAFIAGSQMPLFALGIKKIAILFCCASVITLIVYTIIEHICFGT  
MDR12 ABCB14 NCQLNAPEWLYALLGSGI GAVLAGSQPALFSMGVDKVAIIFV GAGIVTAPIYILQHYFYTL  
MDR15 ABCB13 NCQLNSPEWPYALLGSGI GAVLAGAQTPLFSMGVEKVAIIFAGAGIVTAPIYLLQHYFYTL  
MDR14 ABCB20 KCELSFPEWLYAVLGS LGAAIFGFSFNPLLAYVVDKWCLIIACMGIVTVVANFLQHFYFGI  
MDR6 ABCB6 KCELSFPEWLYAVLGS LGAAIFGFSFNPLLAYVVDKWCLIIACMGIVTVVANFLQHFYFGI  
MDR3\_ ABCB3 RLQLNKPEITLILGTL LGAVNGTIFPIFGILSRFWSMIFVLLGVA SLIVYPMHTYLFVAV  
MDR5 ABCB5 RLQLNKPEIPILILGTL LGAVNGTIFPIFGILSRFWSMIFVLLGVA AVIVYPTNYLFAI  
MDR16 ABCB12 RCQLNKPEIPVLL LGTVAAINGAIFPLFGILSRFWAIFVALGVTSLIVSPSOMYLFVAV  
MDR8 ABCB11 RLQLNKPEIPVLL LGTVAAINGAIFPLFGILSRFWAIFVALGVTSLIVSPTOMYLFVAV  
MDR17 ABCB21 RLQLNKPEIPMLILG SIAAVLNGVILPIFGILTRFWAIFMLLGVAS MVVFPAQTIFFSI  
MDR4 ABCB4 RLQLNKPEIPVLI LGSIAAANGVILPIFGILTSFWAIFMVLGFASI IAYPAQTFFFAI  
MDR9 ABCB9 RLQLNKPEIPVLV LGSIAAMVHGTVPPIFGLLSHFWAL IYIALGLTNFVMPVQNYFFGI  
MDR7 ABCB7 RLQLNKPEISVLL LGSIAAVIHGVFPVQGLLSLFWALIFVALGLTDLIVIPLQNYLFAI  
MDR19 ABCB17 SLQMNRPWKHALY GCLSAALVGVLPQVSAYSTRIYVLLFVGLAIFSFV LNISQHYGFAY  
MDR20 ABCB18 RLQMNRPWKHALY GCLGAALFVAVQPIYSYSTRIYVLLFVGLALFTFLSNISQHYGFAY  
MDR18 ABCB16 RLQMNRPWKHALY GCLSASLGAVQPIYAYSTRIYVLLFVGLALFTFFTSISQOYSFSY  
MDR13 ABCB15 HLQMNLPWKQALY GCISATLFGAIQPAYAYSTRIYALS FVGLAVLSFLINISQHYNFAY

610 620 630 640 650 660

....|....|....|....|....|....|....|....|....|....|....|....|....|  
MDR1 ABCB1 VGENLTKRVREKMLS AVLKNEMAWFDQEENESARIAARLALDANNVRSATGDRI SVIVQN  
MDR11 ABCB19 MGENLTTVRVRMMLS AILRNEVGWFDDEHNSSLIAARLATDAADVKSATAERISVILQN  
MDR10 ABCB10 MGERLTLVRQKMFSA IILRNEIGWFDKVDNTSSMLASRLES DATLLRTIVVDRSTILLEN  
MDR2 ABCB2 MGERLTLVRRENMFRA IILKNEIGWFDDEVNTSSMLASRLES DATLLKTI VVDRSTILLQN  
MDR12 ABCB14 MGERLTSRVRLS LFSAILSNEIGWFDLDENNTGSLT SIIAADATLVRSAIADR LSTIVQN  
MDR15 ABCB13 MGERLTSRVRLS LFSAILSNEIGWFDLDENNTGSLT SIIAADATLVRSAIADR LSTIVQN  
MDR14 ABCB20 MGEKMTERVRRM MFSAMLRNEVGWFDDEENS PDTLSMRLANDATFVRAAFSNRLSIFIQD  
MDR6 ABCB6 MGEKMTERVRRM MFSAMLRNEVGWYDEEENS PDTLSMRLANDATFVRAAFSNRLSIFIQD  
MDR3\_ ABCB3 AGGRLIQRIRVMCF EKVVHMEVGWFDDEPENSSGTIGSRLSADAALIKTLVGD SLSLSVKN  
MDR5 ABCB5 AGGRLIRRI RSMCFEKVVHMEVGWFDDEPENSSGAMGARLSADAALIRTLVGD SLCLSVKN  
MDR16 ABCB12 AGGKLIRRI RSMCFEKAVHMEVSWFDEPENSSGTMGARLSDAALIRALVGDALSLAVQN  
MDR8 ABCB11 AGGKLIRRI RSMCFEKAVHMEVAWFDDEPENSSGTMGARLSADATLIRALVGDALSLAVQN

|       |        |                                                                |
|-------|--------|----------------------------------------------------------------|
| MDR17 | ABCB21 | AGCKLVQRIRSMCFEKVVMEVGVFDETENSSGAIGARLSADAATVRGLVGDALAQTVQN    |
| MDR4  | ABCB4  | AGCKLVQRIRSMCFEKVVHMEVGVFDEPENSSGTIGARLSADAATIRGLVGDLSLAQTVQN  |
| MDR9  | ABCB9  | AGGKLIKRIIRSMCFDKVHVHQEISWFDDTANSRSLV-----GDALALIVQN           |
| MDR7  | ABCB7  | AGAKLIKRIIRSLSEFDRVLHQDISWFDDTKNSSGVIIGARLSTDASTVKSIVGDVGLIMQN |
| MDR19 | ABCB17 | MGEYLTKRIRERQMLSKILTFEVNWFIDDDNSSGAICSRSLAKDANVVRSVMGDRMSLLVQT |
| MDR20 | ABCB18 | MGEYLTKRIRERMLGKILTFEVNWFDDKDNSSGAICSRSLAKDANMVRSVLGDRMSLLVQT  |
| MDR18 | ABCB16 | MGEYLTKRIRERQMLSKILTFEVNWFDEEENSSGAICSRSLAKDANVVRSVLGERMSLLVQT |
| MDR13 | ABCB15 | MGEYLTKRIRERMLSKVILTFEVGVFDRDENSSGAICSRSLAKDANVVRSVLGDRMALVQT  |

670 680 690 700 710 720

|       |        |                                                                 |
|-------|--------|-----------------------------------------------------------------|
| MDR1  | ABCB1  | TALMLVACTAGFVLQWRLLALVAVFPVVVAATVLOKMFMTGFSGDLEAAHAKGTQLAGE     |
| MDR11 | ABCB19 | MTSLLTSFTVAFIVEWRVSLLLIGTFPLLVLANFAQQLSLKGFAGDTAKAHAKTSMIAGE    |
| MDR10 | ABCB10 | LGLVVTAFIISFILNWRILTLLVVLATYPLIISGHISEKIFMQGYGGNLSKAYLKANMLAGE  |
| MDR2  | ABCB2  | LGLVVTAFIIFILNWRILTLLVVLATYPLVISGHISEKLFMQGYGGDLNKAYLKANMLAGE   |
| MDR12 | ABCB14 | LSLTITALALAFFYSWRVAAVVTACFPLLIAASLTEQLFLKGFGGDYTRAYSRAATSLARE   |
| MDR15 | ABCB13 | LSLTITALALAFFYSWRVAAVVTACFPLLIAASLTEQLFLKGFGGDYTRAYSRAATSVARE   |
| MDR14 | ABCB20 | SFAVIVALLIGLLGWRLLALVALATLPVLTLSAIAQKLWLAGFSKGIQEMHRKASLVLED    |
| MDR6  | ABCB6  | SFAVIVALLIGLLGWRLLALVALATLPVLTLSAIAQKLWLAGFSKGIQEMHRKASLVLED    |
| MDR3  | ABCB3  | AAAASVGLIIAFTASWKLAVIILVMIPLIGINGYLOIKFKFTADAKAKYEEASQVAND      |
| MDR5  | ABCB5  | VASLVTGLIIAFTASWEVAIIILVLIIPFIGINGYIYQIKFKMGFSADAKAKYEEASQVAND  |
| MDR16 | ABCB12 | AASAASGLIIAFTASWELALIIILVMLPLIGINGFLQVKFMKGFSAKAKYEEASQVAND     |
| MDR8  | ABCB11 | VASAASGLIIAFTASWELALIIILVMLPLIGINGFVQVKFMKGFSAKAKYEEASQVAND     |
| MDR17 | ABCB21 | LASVTAGLVIAFVASWQLAFIVLAMLPLIGINGYIYMKFMVGFSAKAKYEEASQVAND      |
| MDR4  | ABCB4  | LSSILAGLIIAFLACWQLAFVVLAMLPLIALNGFLYMKFMKGFSAKAKMYGEASQVAND     |
| MDR9  | ABCB9  | IATVTTGLIIAFTANWILALIVLALSPFIVIQGYAQTFTGFSADAKAMYEEASQVAND      |
| MDR7  | ABCB7  | MATIIIGAFIIAFTANWLLALMALLVAPVMFFQGYIYQIKFKITGFGAKARGKYEEASQVAND |
| MDR19 | ABCB17 | ISAVIIACIIGLVIAWRLLVMIISVQPLIVVCFYTORVLLKSLSEKASKAQDESSKLAAE    |
| MDR20 | ABCB18 | ISAVSITCAIIGLVISWRFSIVMMSVQPVIVVCFYTORVLLKSMRSLNAIKGQDESSKLAAE  |
| MDR18 | ABCB16 | ISTVMVACTIIGLVIAWRFTIVMISVQPVIVCYIYQVLLKSNMSSKKAIAQDESSKLAAE    |
| MDR13 | ABCB15 | VSAVTIIAFTMGLVIAWRLLVMIIVQVPIIVCFYTRRVLLKSMSSKKAIAQDESSKLAAE    |

730 740 750 760 770 780

|       |        |                                                                |
|-------|--------|----------------------------------------------------------------|
| MDR1  | ABCB1  | AIANVRTVAEFNSEAKIVRRLYTANLEPPLKRFILMVSANGAAETLTLAPDFIKGGQAMRSV |
| MDR11 | ABCB19 | GVSNI RTVAEFNAQSKILSLFCHELRVPOKRFILVITANSVAETVSLAPEIRGGEAVGVS  |
| MDR10 | ABCB10 | SISNI RTVVAFCAEKVLDSLKELLEPSERFLIVTALVMGEVLALAPDLLKGNQMVSV     |
| MDR2  | ABCB2  | SVSNI RTVAEFCAEEKILELPSRELLEPSKSFILVITALAMGETLALAPDLLKGNQMVASV |
| MDR12 | ABCB14 | AISNI RTVAEFSAEKQISEQFTCELSKPTKSFLLVTAYSVAETLALTPDIVKGTQALGSV  |
| MDR15 | ABCB13 | AIANI RTVVAAYGAEKQISEQFTCELSKPTKNFLIVTAFSVSETLALTPDIVKGTQALGSV |
| MDR14 | ABCB20 | AVRNIYTVVAFCAAGNKMELYRMLQRLRQYFSFATFALVEPFGLAPYILKRRKSLISV     |
| MDR6  | ABCB6  | AVRNIYTVVAFCAAGNKMELYRLQLRQLRQYFSFATFALVEPFGLAPYILKRRRSLASV    |
| MDR3  | ABCB3  | AVGSIRTVASFCAEEKVMEMYYKKRCEDTIKSFLTMTAIGISQASSFAPDSSKAKGAAASI  |
| MDR5  | ABCB5  | AVGSIRTVASFCAEEKVMEMYYKKRCEDTIKSFLTTLTAVGISQASSFAPDSSKKGAAVASI |
| MDR16 | ABCB12 | AVGSIRTVASFCAEEKVMQYMKKQCEGPIKDFLTMAAIGISQSSTFAPDSSKAKVAAASI   |
| MDR8  | ABCB11 | AVGSIRTVASFCAEEKVMQYMKKQCEGPIKDFLTMAAIGISQSSTFAPDSSKAKVAAASI   |
| MDR17 | ABCB21 | AVGSIRTVASFCAEEKVMKMYKKKCEGPMRTFLTMAAVASISQSSSLSPDSSKASNAAAASI |
| MDR4  | ABCB4  | AVGSIRTVASFCAEDKVMNMYSKKCEGPMKNTFLTMAAMASISQSSSLSPDSSKADVAAASI |
| MDR9  | ABCB9  | AVSSIRTVASFCAEEKVMDLYQKCKDGPKNFLTIMAIGVSQTSAMAPDSSNKAKDSAASI   |
| MDR7  | ABCB7  | AVSSIRTVASFCAEDKVMMDLYQKCKDPEKQFLTLTAVGVTQSTMAPDINKAKDSAASI    |
| MDR19 | ABCB17 | AVSNIRTIITAFSSQERIKLLKVMQEGPREFFVTTGRVIAEAGTMTTDLARGLDVAVGSV   |
| MDR20 | ABCB18 | AVSNIRTIITAFSSQERIKLLKVMQEGPREFFFASTGRVIAEAGTMTTKDLVKGSDAVASV  |
| MDR18 | ABCB16 | AVSNIRTIITAFSSQERIKLLERVQEGPREFFKTTGRAIAEAGTMTTDLAKGNSVDSV     |
| MDR13 | ABCB15 | AVSNVRTIITAFSSQERIKMLLEKQAESPREFLVSTGRVIAEAGTMTTDLAKGSDAVGSV   |

790 800 810 820 830 840

|       |        |                                                               |
|-------|--------|---------------------------------------------------------------|
| MDR1  | ABCB1  | FELLDKRTETEDDPTTPVPDRLRGEVELKHIDFSYPSRPDIQIFRDLISLRARAGKTLA   |
| MDR11 | ABCB19 | FVSLDRQTRIDEEDD-ADADPVETIRGDIEFRHVDFAFPSRPDVMVFRDFNLRIRAGHSQA |
| MDR10 | ABCB10 | FELLDRTQVVG---DTGEELSNVEGTIELKGVHFSYPSRPDVTIFSDFNLLVPSGKSMA   |
| MDR2  | ABCB2  | FELLDKRTQIVG---ETSEELNNVEGTIELKGVHFSYPSRPDVVIFRDFLIVRAGKSMA   |
| MDR12 | ABCB14 | FRVLHRETEIPEEQ-PNSRLVTHIKGDIEFRNVSFAYPTREIAIAFKNLLNLRVSAGKSLA |
| MDR15 | ABCB13 | FRVLHRETKIPEEQ-PNSRMVSQVKGDIENFRNVSFVYPTREIDIFKNLLNLRVSAGKSLA |



|       |        |                                                                |
|-------|--------|----------------------------------------------------------------|
| MDR1  | ABCB1  | RKAEIMLLDEATSALDAESERSVQEALDQACS-GRTSIVVAHRLSTIRNAHVIAVIDDGK   |
| MDR11 | ABCB19 | KNPTVLLLDEATSALDAESECVLQEALER-LMRGRTTVVVAHRLSTIRGVDCIGVIQDGR   |
| MDR10 | ABCB10 | KNPEILLLDEATSALDVESERVVQALDR-LMRDRTTVVVAHRLSTIKNSDMISVIQDGR    |
| MDR2  | ABCB2  | KNFAILLLDEATSALDVESERVVQALDR-LMANRTTVVVAHRLSTIKNADTISVLHGK     |
| MDR12 | ABCB14 | KDESVLLLDEATSALDTSAEKQVQEALDK-LMKGRTTILVAHRLSTIRKADTIVVLHKGK   |
| MDR15 | ABCB13 | KDESVLLLDEATSALDTSSEKLVQEALDK-LMKGRTTVLVAHRLSTIRKADTVAVLHKGR   |
| MDR14 | ABCB20 | KNAPTILIDEASSSIESESRRVQEALDTLIMGNKTTILIAHRAAMMRHVNDIVVLNGGR    |
| MDR6  | ABCB6  | KNAPILLIDEASSSIESESRRVQEALDTLIMGNKTTILIAHRVAMMRHVNDIVVLNGGK    |
| MDR3  | ABCB3  | KEPKILLLDEATSALDAESERVVQDALDR-VMVNRRTTVVVAHRLSTIKNADVIAVVKNGV  |
| MDR5  | ABCB5  | KEPKILLLDEATSALDAESERVVQDALDR-VMVNRRTTIVVAHRLSTIKNADVIAVVKNGV  |
| MDR16 | ABCB12 | KEPKILLLDEATSALDAESERLVQDALDR-VIVNRRTTVVVAHRLSTIKNADVIAIVKNGV  |
| MDR8  | ABCB11 | KEPKILLLDEATSALDAESERVVQDALDR-VMVNRRTTIVVAHRLSTIKNADVIAVVKNGV  |
| MDR17 | ABCB21 | KDPKVVLLLDEATSALDAESERVVQDALDR-VMVNRRTTVVVAHRLSTIKNADVIAVVKNGV |
| MDR4  | ABCB4  | KDPKVVLLLDEATSALDAESERVVQDALDR-VMVNRRTTIVVAHRLSTIKNADVIAVVKNGV |
| MDR9  | ABCB9  | KDPKILLLDEATSALDAESERVVQDALDR-VMVNRRTTVVVAHRLTTIKNADVIAVVKNGV  |
| MDR7  | ABCB7  | KDPKILLLDEATSALDAESERVVQDALDQ-VMVNRRTTVVVAHLLTTIKDADMIAVVKNGV  |
| MDR19 | ABCB17 | KNPSVLLLDEATSALDSKSERVVQDALER-VMVGRTSIMIAHRLSTIQNCDMIIVVLGKGR  |
| MDR20 | ABCB18 | KNPSVLLLDEATSALDSQSERVVQDALER-LMVGRTSVVIAHRLSTIQKCDTIAVLENGA   |
| MDR18 | ABCB16 | KNPSILLLDEATSALDSQSERVVQDALEH-VMVGKTSVVIHRLSTIQNCDTIAVLDKGR    |
| MDR13 | ABCB15 | KNPSVLLLDEATSALDSQSERVVQDALER-VMVGRTSVVIAHRLSTIQNCDAIAVLDKGR   |

1030

|       |        |             |
|-------|--------|-------------|
|       |        | .... .... . |
| MDR1  | ABCB1  | VAEQGSHSHLL |
| MDR11 | ABCB19 | IVEQGSHSELV |
| MDR10 | ABCB10 | IIEQGSHNILL |
| MDR2  | ABCB2  | IVEQGSHRKLV |
| MDR12 | ABCB14 | VVEKGSHRELV |
| MDR15 | ABCB13 | VVEKGSHRELV |
| MDR14 | ABCB20 | IVEEGTHDSL  |
| MDR6  | ABCB6  | IVEEGTHDCLA |
| MDR3  | ABCB3  | IVEKGTHETLI |
| MDR5  | ABCB5  | IAEKGTHETLI |
| MDR16 | ABCB12 | IAENGTHETLI |
| MDR8  | ABCB11 | IAEKGTHETLI |
| MDR17 | ABCB21 | IVEKGKHETLI |
| MDR4  | ABCB4  | IVEKGKHETLI |
| MDR9  | ABCB9  | IAEKGRHETLM |
| MDR7  | ABCB7  | IAESGRHETLM |
| MDR19 | ABCB17 | IVESGTHSSLL |
| MDR20 | ABCB18 | VVECGNHSSLL |
| MDR18 | ABCB16 | VVESGTHASLL |
| MDR13 | ABCB15 | LVERGTHSSLL |
